# Supplementary material
Source: PubMed Central journal article supplement (PMC4824595)

## Supplementary Figure Legends

**Figure S1.** Expression and cellular localization of BECN1s. (A) RT-PCR was performed with total RNAs extracted from the indicated cell lines using primers P1 and P2. (B) U2OS cells expressing either GFP, GFP-BECN1 or GFP-BECN1s were stained with MitoTracker Red. The images were taken under a fluorescence microscope. (C) MEF cells expressing GFP, GFP-BECN1 or GFP-BECN1s were stained with MitoTracker Red. The images were taken under a fluorescence microscope.

**Figure S2.** Both BECN1 and BECN1s bind to ATG14 and BCL2. (A) HEK 293T cells were transfected with constructs encoding Flag-*BECN1*, Flag-*BECN1s* and GFP-*ATG14* in the indicated combinations. Twenty-four h later, cell lysates were immunoprecipitated with anti-Flag antibody, followed by immunoblotting with anti-Flag and anti-GFP antibodies. (B) HEK 293T cells were transfected with constructs encoding either Flag-*BECN1* or Flag-*BECN1s* as indicated. Twenty-four h later, cell lysates were immunoprecipitated with anti-Flag antibody, followed by immunoblotting with anti-BCL2 antibody.

**Figure S3.** Neither BECN1 nor BECN1s interacts with HSP90, FUNDC1 or BNIP3L. HEK 293T cells were transfected with the indicated plasmids. Twenty-four h after transfection, cell lysates were immunoprecipitated with anti-GFP antibody, followed by immunoblotting with anti-Flag and anti-GFP antibodies.

**Figure S4.** Effect of BECN1s on EBSS-induced autophagy. (A) The shRNA-mediated knockdown efficiency for *BECN1* and *BECN1s* was verified by real-time RT-PCR analysis for Figure 4A. (B) U2OS cells expressing the indicated shRNAs were treated with EBSS for the indicated periods of time. Cell lysates were then analyzed by western blot with the indicated antibodies. The shRNA-mediated knockdown efficiency for *BECN1* and *BECN1s* was verified by real-time RT-PCR analysis. (C) The shRNA-mediated knockdown efficiency for *BECN1s* was verified by real-time RT-PCR analysis for Figure 4C. (D) HCT116 cells transfected with the indicated shRNA were cultured in normal growth medium or treated with EBSS in the absence or presence of bafilomycin A<sub>1</sub> (BAF) treatment. Cell lysates were

analyzed by western blot with anti-SQSTM1 and anti-LC3 antibodies. The knockdown efficiency for *BECN1s* is also shown. (E) The shRNA-mediated knockdown efficiency for *BECN1s* was verified by real-time RT-PCR analysis for Figure 4D.

A

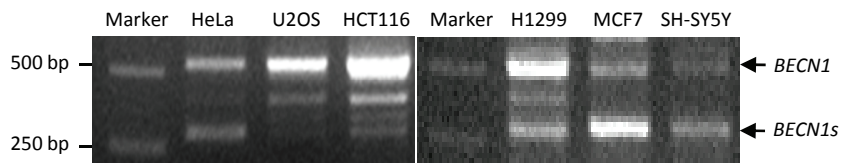

B

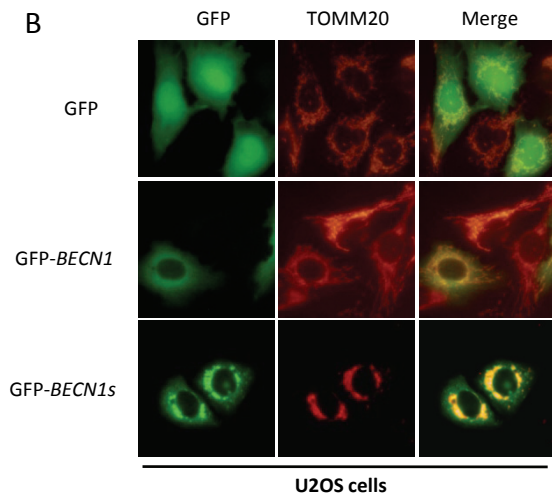

C

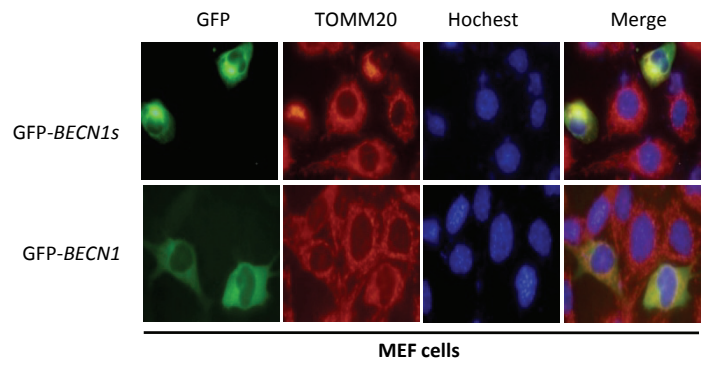

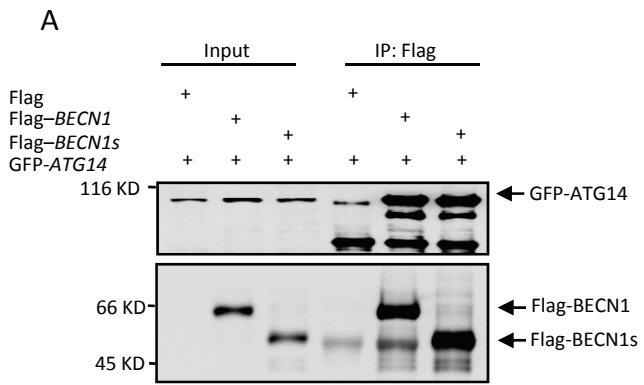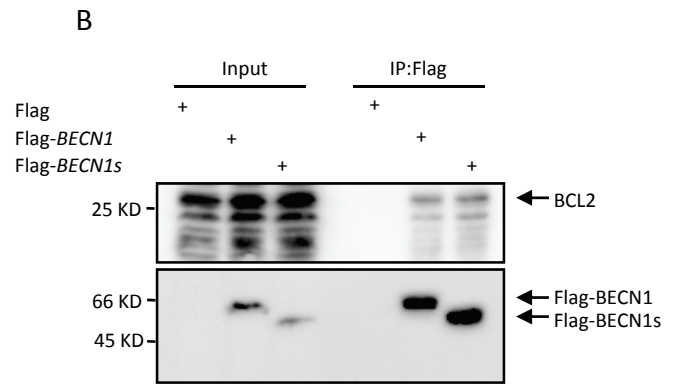

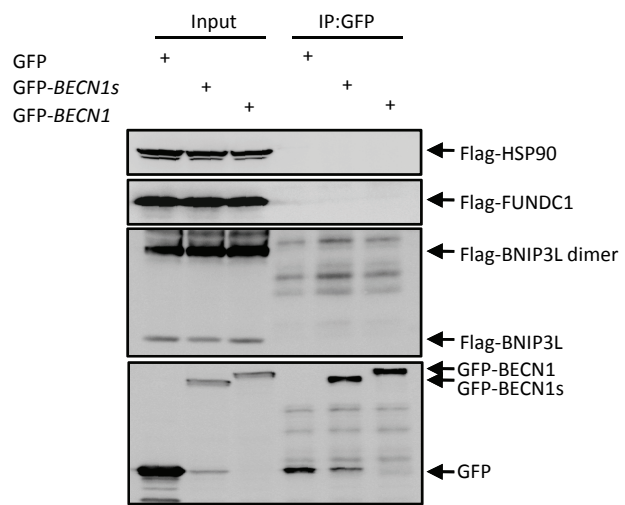

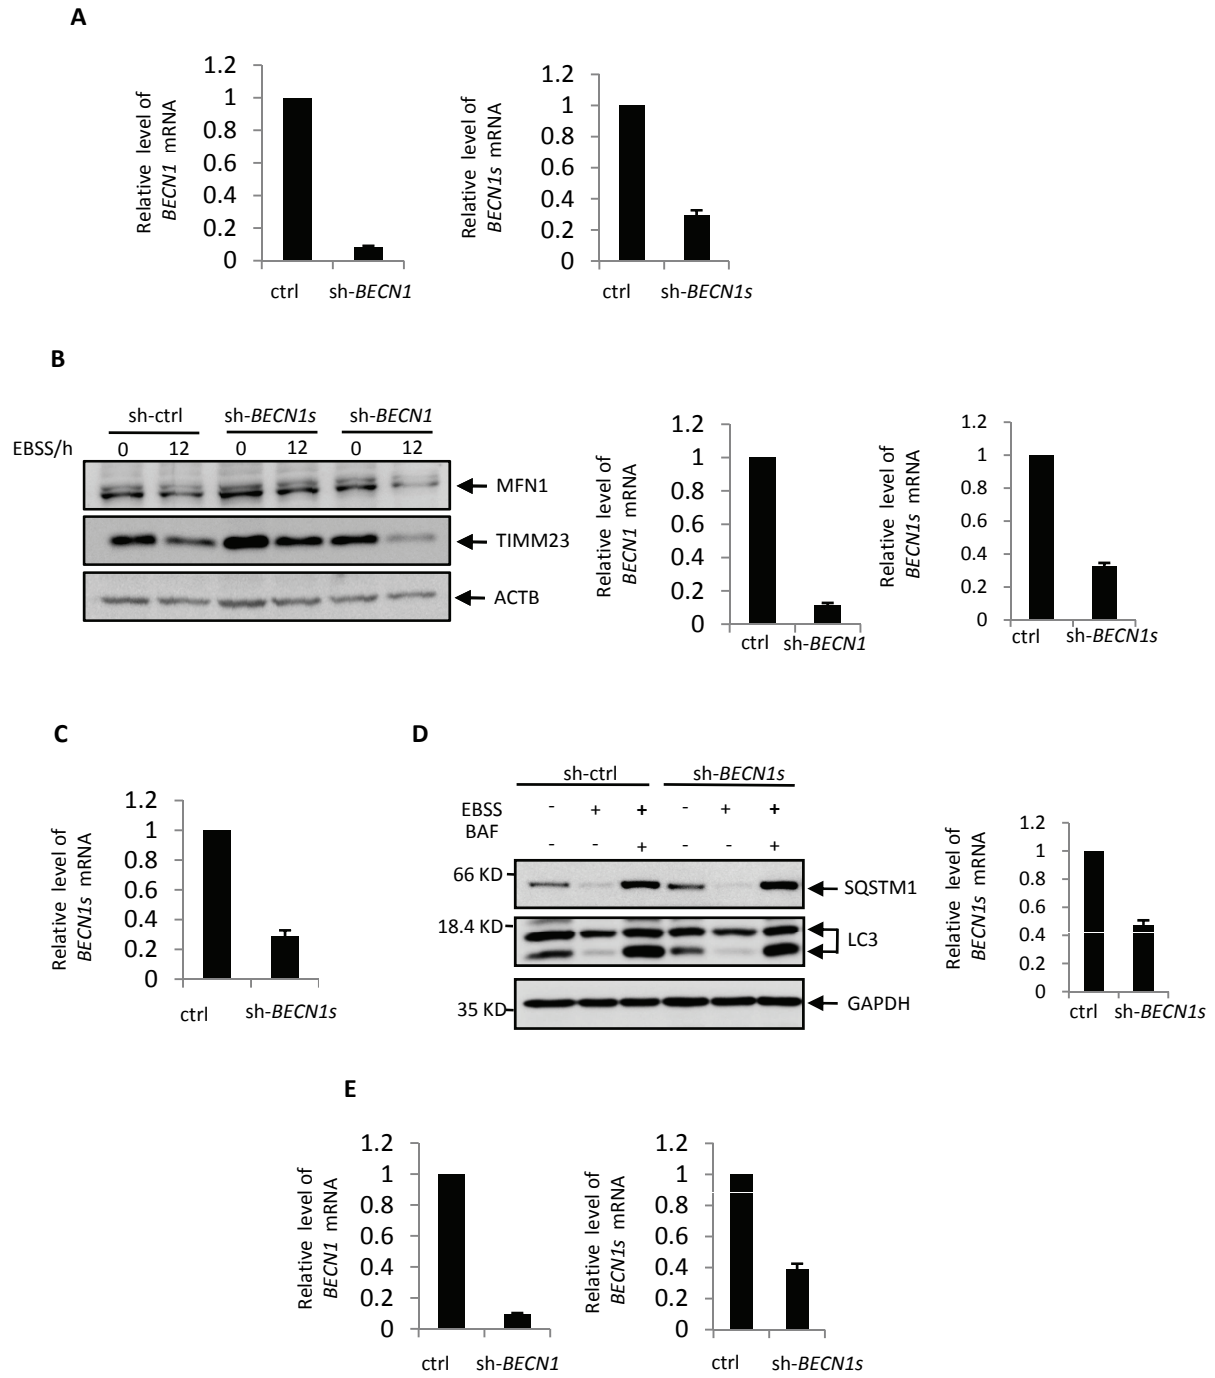

Supplement: kaup-11-11-1100785-s001.pdf [file kaup-11-11-1100785-s001.pdf]
